# Supplementary material for: Evaluation of the relevance of DILI predictive hypotheses in early drug development: review ofin vitromethodologiesvs. BDDCS classification
Source: Royal Society of Chemistry journal article supplement (doi:10.1039/c8tx00016f), 2018-04-18
Supplement: c8tx00016f1.pdf [file c8tx00016f1.pdf]

**Table S1. Comparison of Various Assays Measuring Key Mechanisms of Toxicity Endpoints Associated with DILI (Adapted from Reference 15).**

| Criteria                                       | Sensitivity | Specificity | % Correct (Positive Predictive Value, PPV) | % DILI Missing (False Negative Rate, FNR) | % Accuracy (ACC) (True Positive + True Negative)/106 |
|------------------------------------------------|-------------|-------------|--------------------------------------------|-------------------------------------------|------------------------------------------------------|
| GSH                                            | 47.9%       | 85.5%       | 71.9%                                      | 52.1%                                     | 69.1%                                                |
| TDI                                            | 18.8%       | 95.2%       | 75.0%                                      | 81.3%                                     | 61.8%                                                |
| Cytotoxicity (3T3 cells)                       | 29.2%       | 75.8%       | 48.3%                                      | 70.8%                                     | 55.5%                                                |
| Mitotox                                        | 20.8%       | 93.5%       | 71.4%                                      | 79.2%                                     | 61.8%                                                |
| BSEP                                           | 37.5%       | 87.1%       | 69.2%                                      | 62.5%                                     | 65.5%                                                |
| All assays                                     | 85.4%       | 64.5%       | 65.1%                                      | 14.6%                                     | 73.6%                                                |
| BDDCS Class 1                                  | 25.0%       | 61.3%       | 33.3%                                      | 75.0%                                     | 45.5%                                                |
| BDDCS Class 2                                  | 64.6%       | 72.6%       | 64.6%                                      | 35.4%                                     | 69.1%                                                |
| GSH and BDDCS Class 2                          | 35.4%       | 96.8%       | 89.5%                                      | 64.6%                                     | 70.0%                                                |
| BSEP and BDDCS Class 2                         | 29.2%       | 96.8%       | 87.5%                                      | 70.8%                                     | 67.3%                                                |
| BSEP Inhibitor and Mitotox Positive            | 4.2%        | 96.8%       | 50.0%                                      | 95.8%                                     | 56.4%                                                |
| BSEP Inhibitor and Negative Cytotox or Mitotox | 18.8%       | 95.2%       | 75.0%                                      | 81.3%                                     | 61.8%                                                |
| BSEP Inhibitor or Positive Cytotox or Mitotox  | 68.8%       | 64.5%       | 60.0%                                      | 31.3%                                     | 66.4%                                                |

**Table S2. Comparison of Toxicity Endpoints Associated with DILI for 3D Spherical Human Liver Microtissues (hLiMT), 2D Primary Human Hepatocytes (PHH) for the 110 Compound Data Set<sup>52</sup>**

| Measurement                                                           | Sensitivity | Specificity | % Correct (Positive Predictive Value, PPV) | % DILI Missing (False Negative Rate, FNR) | % Accuracy (ACC) (True Positive + True Negative)/110 |
|-----------------------------------------------------------------------|-------------|-------------|--------------------------------------------|-------------------------------------------|------------------------------------------------------|
| 3D hLiMT IC <sub>50</sub> cutoff 10μM                                 | 18.8%       | 92.7%       | 81.3%                                      | 81.2%                                     | 46.4%                                                |
| 3D hLiMT IC <sub>50</sub> cutoff 25μM                                 | 37.7%       | 87.8%       | 83.9%                                      | 62.3%                                     | 56.4%                                                |
| 3D hLiMT IC <sub>50</sub> cutoff 50μM                                 | 52.2%       | 85.4%       | 85.7%                                      | 47.8%                                     | 64.5%                                                |
| 3D hLiMT IC <sub>50</sub> cutoff 100μM                                | 60.9%       | 85.4%       | 87.5%                                      | 39.1%                                     | 70.0%                                                |
| 3D hLiMT Margin of Safety (IC <sub>50</sub> /C <sub>max</sub> ) 10μM  | 36.2%       | 97.6%       | 96.2%                                      | 63.8%                                     | 59.1%                                                |
| 3D hLiMT Margin of Safety (IC <sub>50</sub> /C <sub>max</sub> ) 25μM  | 47.8%       | 92.7%       | 91.7%                                      | 52.2%                                     | 64.5%                                                |
| 3D hLiMT Margin of Safety (IC <sub>50</sub> /C <sub>max</sub> ) 50μM  | 52.2%       | 85.4%       | 85.7%                                      | 47.8%                                     | 64.5%                                                |
| 3D hLiMT Margin of Safety (IC <sub>50</sub> /C <sub>max</sub> ) 100μM | 59.4%       | 80.5%       | 83.7%                                      | 40.6%                                     | 67.3%                                                |
| 2D PHH IC <sub>50</sub> cutoff 10μM                                   | 4.3%        | 97.6%       | 75.0%                                      | 95.7%                                     | 39.1%                                                |
| 2D PHH IC <sub>50</sub> cutoff 25μM                                   | 17.4%       | 92.7%       | 80.0%                                      | 82.6%                                     | 45.5%                                                |
| 2D PHH IC <sub>50</sub> cutoff 50μM                                   | 29.0%       | 90.2%       | 83.3%                                      | 71.0%                                     | 51.8%                                                |
| 2D PHH IC <sub>50</sub> cutoff 100μM                                  | 33.3%       | 85.4%       | 79.3%                                      | 66.7%                                     | 52.7%                                                |
| 2D PHH Margin of Safety (IC <sub>50</sub> /C <sub>max</sub> ) 10μM    | 20.3%       | 97.6%       | 93.3%                                      | 79.7%                                     | 49.1%                                                |
| 2D PHH Margin of Safety (IC <sub>50</sub> /C <sub>max</sub> ) 25μM    | 27.5%       | 95.1%       | 90.5%                                      | 72.5%                                     | 52.7%                                                |
| 2D PHH Margin of Safety (IC <sub>50</sub> /C <sub>max</sub> ) 50μM    | 33.3%       | 85.4%       | 79.3%                                      | 66.7%                                     | 52.7%                                                |
| 2D PHH Margin of Safety (IC <sub>50</sub> /C <sub>max</sub> ) 100μM   | 40.6%       | 85.4%       | 82.4%                                      | 59.4%                                     | 57.3%                                                |

**Table S3. Comparison of Toxicity Endpoints Associated with DILI for 3D Spherical Human Liver Microtissues (hLiMT), 2D Primary Human Hepatocytes (PHH)<sup>52</sup> and Other Measures for the 100 Compounds where BDDCS Classification was Known**

| Measurement                                                           | Sensitivity | Specificity | % Correct (Positive Predictive Value, PPV) | % DILI Missing (False Negative Rate, FNR) | % Accuracy (ACC) (True Positive + True Negative)/100 |
|-----------------------------------------------------------------------|-------------|-------------|--------------------------------------------|-------------------------------------------|------------------------------------------------------|
| 3D hLiMT IC <sub>50</sub> cutoff 10μM                                 | 17.7%       | 94.7%       | 84.6%                                      | 82.3%                                     | 47.0%                                                |
| 3D hLiMT IC <sub>50</sub> cutoff 25μM                                 | 38.7%       | 89.5%       | 85.7%                                      | 61.3%                                     | 58.0%                                                |
| 3D hLiMT IC <sub>50</sub> cutoff 50μM                                 | 53.2%       | 86.8%       | 86.8%                                      | 46.8%                                     | 66.0%                                                |
| 3D hLiMT IC <sub>50</sub> cutoff 100μM                                | 62.9%       | 86.8%       | 88.6%                                      | 37.1%                                     | 72.0%                                                |
| 3D hLiMT Margin of Safety (IC <sub>50</sub> /C <sub>max</sub> ) 10μM  | 33.9%       | 97.4%       | 95.5%                                      | 66.1%                                     | 58.0%                                                |
| 3D hLiMT Margin of Safety (IC <sub>50</sub> /C <sub>max</sub> ) 25μM  | 46.8%       | 92.1%       | 90.6%                                      | 53.2%                                     | 64.0%                                                |
| 3D hLiMT Margin of Safety (IC <sub>50</sub> /C <sub>max</sub> ) 50μM  | 50.0%       | 84.2%       | 83.8%                                      | 50.0%                                     | 63.0%                                                |
| 3D hLiMT Margin of Safety (IC <sub>50</sub> /C <sub>max</sub> ) 100μM | 58.1%       | 78.9%       | 81.8%                                      | 41.9%                                     | 66.0%                                                |
| 2D PHH IC <sub>50</sub> cutoff 10μM                                   | 4.8%        | 97.4%       | 75.0%                                      | 95.2%                                     | 40.0%                                                |
| 2D PHH IC <sub>50</sub> cutoff 25μM                                   | 16.1%       | 94.7%       | 83.3%                                      | 83.9%                                     | 46.0%                                                |
| 2D PHH IC <sub>50</sub> cutoff 50μM                                   | 29.0%       | 92.1%       | 85.7%                                      | 71.0%                                     | 53.0%                                                |
| 2D PHH IC <sub>50</sub> cutoff 100μM                                  | 32.3%       | 86.8%       | 80.0%                                      | 67.7%                                     | 53.0%                                                |
| 2D PHH Margin of Safety (IC <sub>50</sub> /C <sub>max</sub> ) 10μM    | 21.0%       | 97.4%       | 92.9%                                      | 79.0%                                     | 50.0%                                                |
| 2D PHH Margin of Safety (IC <sub>50</sub> /C <sub>max</sub> ) 25μM    | 27.4%       | 94.7%       | 89.5%                                      | 72.6%                                     | 53.0%                                                |
| 2D PHH Margin of Safety (IC <sub>50</sub> /C <sub>max</sub> ) 50μM    | 32.3%       | 84.2%       | 76.9%                                      | 67.7%                                     | 52.0%                                                |
| 2D PHH Margin of Safety (IC <sub>50</sub> /C <sub>max</sub> ) 100μM   | 40.3%       | 84.2%       | 80.6%                                      | 59.7%                                     | 57.0%                                                |
| BDDCS Class 2                                                         | 41.9%       | 76.3%       | 74.3%                                      | 58.1%                                     | 55.0%                                                |
| C <sub>max</sub> > 1.3 uM                                             | 71.0%       | 76.3%       | 83.0%                                      | 29.0%                                     | 73.0%                                                |
